# Supplementary material for: Linked seasonal outbreaks of Salmonella Typhimurium among passerine birds, domestic cats and humans, Sweden, 2009 to 2016
Source: PubMed Central journal article supplement (PMC6712933; doi:10.2807/1560-7917.es.2019.24.34.1900074), 2019-08-22
Supplement: 19-00074_SODERLUND_Supplement.pdf [file 19-00074_SODERLUND_Supplement.pdf]

## Supplementary material

This supplementary material is hosted by *Eurosurveillance* as supporting information alongside the article **“Linked springtime outbreaks of *Salmonella Typhimurium* among passerine birds, domestic cats and humans in Sweden, 2009-2016”** on behalf of the authors who remain responsible for the accuracy and appropriateness of the content. The same standards for ethics, copyright, attributions and permissions as for the article apply. *Eurosurveillance* is not responsible for the maintenance of any links or email addresses provided therein.

### Supplementary Table S1 – County codes

#### Boreal

BD – Norrbottens län  
AC – Västerbottens län  
Z – Jämtlands län  
Y – Västernorrlands län  
X – Gävleborgs län  
W – Kopparbergs län / Dalarnas län  
S – Värmlands län  
T – Örebro län

#### Nemo-boreal

C – Uppsala län  
U – Västmanlands län  
AB – Stockholms län (Capital region)  
D – Södermanlands län  
O – Västra Götalands län  
E – Östergötlands län  
F – Jönköpings län  
H – Kalmar län  
I – Gotlands län  
G – Kronobergs län  
K – Blekinge län

#### Nemoral

N – Hallands län  
M – Skåne län

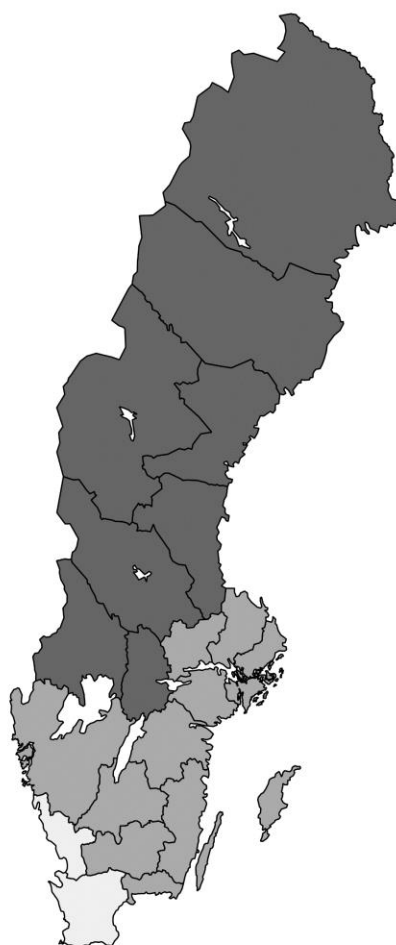

## Supplementary Table S2 – Passerines with STm 2009-2016

| <b>Zone</b>  | <b>2009<br/>(B/S/R)</b> | <b>2010</b> | <b>2011</b> | <b>2012</b> | <b>2013</b> | <b>2014</b> | <b>2015</b> | <b>2016</b> | <b>Total</b> |
|--------------|-------------------------|-------------|-------------|-------------|-------------|-------------|-------------|-------------|--------------|
| Boreal       | (0/0/8)                 | 0           | 0           | 0           | (5/0/5)     | (2/0/0)     | 0           | (5/2/0)     | (12/2/13)    |
| Nemo-boreal  | (0/0/3)                 | (0/2/0)     | 0           | (0/4/0)     | (1/0/0)     | (5/5/0)     | 0           | (10/1/0)    | (16/12/3)    |
| Nemoral      | (0/0/1)                 | 0           | 0           | (1/0/0)     | 0           | 0           | 0           | 0           | (1/0/1)      |
| Capital      | (0/0/1)                 | 0           | 0           | (0/0/1)     | (0/1/0)     | 0           | 0           | (2/2/5)     | (2/3/7)      |
|              |                         |             |             |             |             |             |             |             |              |
| <b>Total</b> | (0/0/13)                | (0/2/0)     | 0           | (1/4/1)     | (6/1/5)     | (7/5/0)     | 0           | (17/5/5)    | (31/17/24)   |

Dead passerines (B bullfinches, S siskins, R redpolls) submitted by the public and diagnosed with STm in Sweden by biogeographical zone and year, 2009-2016. The capital region of Stockholm County, located in the nemo-boreal zone, is shown separately.

### Supplementary Figure S3 – Seasonal decomposition

Seasonal decomposition of monthly data on the number of cases of passerine type STm among passerines (black) cats (blue) and humans (red) performed using the *stl* function in R 3.3.1, with each plot consisting of four panels showing (from the top down) the observations, seasonal component, trend component and remainder.

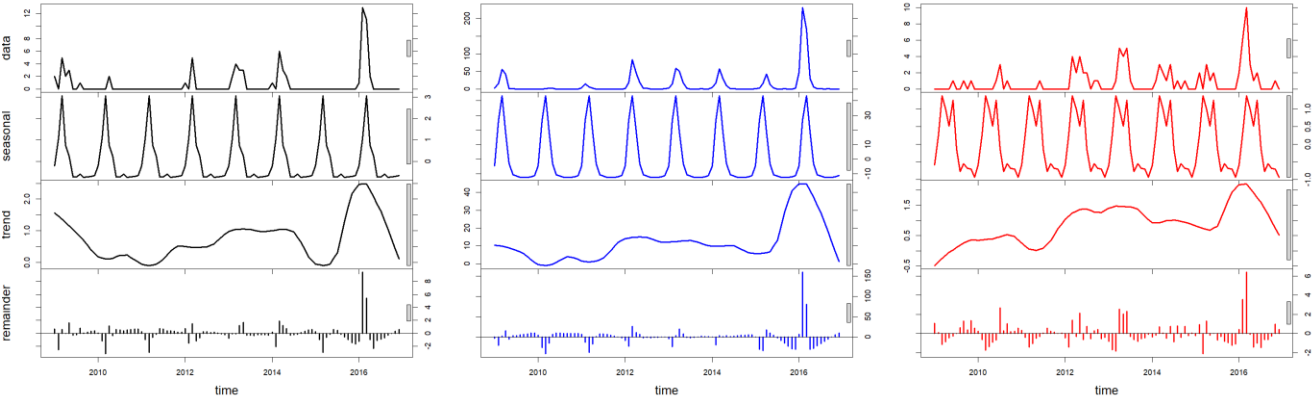

## Supplementary Table S4 – Domestic cases of salmonellosis in Sweden 2009-2016

Number of cases of domestically acquired Salmonella infection in Sweden annually 2009-2016, and the corresponding incidence expressed as cases per 100,000 population.

| <b>Year</b>                   | <b>2009</b> | <b>2010</b> | <b>2011</b> | <b>2012</b> | <b>2013</b> | <b>2014</b> | <b>2015</b> | <b>2016</b> |
|-------------------------------|-------------|-------------|-------------|-------------|-------------|-------------|-------------|-------------|
| Number of cases               | 597         | 840         | 785         | 665         | 654         | 552         | 691         | 648         |
| Incidence<br>(cases per 100k) | 6.4         | 8.9         | 8.3         | 7.0         | 6.8         | 5.7         | 7.0         | 6.5         |
